# Supplementary material for: Quantitative Behavioral Analysis and Qualitative Classification of Attachment Styles in Domestic Dogs: Are Dogs with a Secure and an Insecure-Avoidant Attachment Different?
Source: MDPI journal article supplement (doi:10.3390/ani11010014), 2020-12-23
Supplement: s1 [file s1]

Article

# Quantitative Behavioral Analysis and Qualitative Classification of Attachment Styles in Domestic Dogs: Are Dogs with a Secure and an Insecure-Avoidant Attachment Different?

Giacomo Riggio, Angelo Gazzano, Borbála Zsilák, Beatrice Carlone and Chiara Mariti

**Table S1.** Demographic details for subjects in protocol I and II (f = female, m = male, i = intact, s = spayed, c = castrated).

| Demographic details for subjects in protocol I  |                      |          |                    |                |
|-------------------------------------------------|----------------------|----------|--------------------|----------------|
| Number                                          | Dog's Breed          | Dog' Sex | Dog's Age (Months) | Owner's Gender |
| 1                                               | German Shepherd      | f,i      | 60                 | f              |
| 2                                               | Mix-breed            | m,c      | 84                 | m              |
| 3                                               | Welsh Corgi          | f,i      | 42                 | f              |
| 4                                               | Mix-breed            | f,s      | 240                | f              |
| 5                                               | Labrador Retriever   | f,i      | 34                 | f              |
| 6                                               | Border Collie        | f,i      | 48                 | f              |
| 7                                               | Border Collie        | f,i      | 38                 | f              |
| 8                                               | German Shepherd      | f,i      | 28                 | f              |
| 9                                               | Labrador Retriever   | m,i      | 68                 | m              |
| 10                                              | Welsh Corgi          | m,i      | 42                 | f              |
| 11                                              | Poodle               | m,i      | 30                 | f              |
| 12                                              | Collie               | f,s      | 36                 | f              |
| 13                                              | Springer Spaniel     | m        | 60                 | m              |
| 14                                              | Labrador Retriever   | m        | 48                 | m              |
| 15                                              | Border Collie        | f,s      | 48                 | f              |
| 16                                              | Mix-breed            | m        | 48                 | f              |
| 17                                              | Labrador Retriever   | f,i      | 47                 | f              |
| 18                                              | Bearded Collie       | f,i      | 28                 | f              |
| 19                                              | Bernese Mountain Dog | f,i      | 42                 | m              |
| 20                                              | Belgian Tervuren     | f,i      | 24                 | f              |
| 21                                              | Golden Retriever     | f,i      | 84                 | m              |
| 22                                              | Border Collie        | m,i      | 48                 | f              |
| 23                                              | Australian Kelfie    | f,i      | 36                 | f              |
| 24                                              | Mix-breed            | m,c      | 48                 | m              |
| 25                                              | Mix-breed            | f,s      | 32                 | f              |
| 26                                              | Beagle               | m,i      | 73                 | f              |
| 27                                              | Mix-breed            | f,s      | 36                 | f              |
| Demographic details for subjects in protocol II |                      |          |                    |                |
| Number                                          | Dog's Breed          | Dog' Sex | Dog's Age (Months) | Owner's Gender |
| 1                                               | Labrador Retriever   | m,i      | 18                 | m              |
| 2                                               | German Shepherd      | m,i      | 96                 | m              |
| 3                                               | German Shepherd      | m,i      | 60                 | f              |
| 4                                               | German Shepherd      | m,i      | 84                 | f              |
| 5                                               | Mix-breed            | f,s      | 16                 | f              |
| 6                                               | Mix-breed            | m,i      | 78                 | m              |
| 7                                               | German Shepherd      | f,s      | 120                | m              |

|    |                       |     |    |   |
|----|-----------------------|-----|----|---|
| 8  | Beagle                | m,i | 72 | m |
| 9  | Labrador Retriever    | f,i | 36 | m |
| 10 | Labrador Retriever    | f,i | 36 | m |
| 11 | Belgian Malinois      | m,i | 26 | f |
| 12 | Labrador Retriever    | f,s | 48 | m |
| 13 | Labrador Retriever    | m,i | 14 | m |
| 14 | Labrador Retriever    | m,i | 42 | m |
| 15 | Border Collie         | f,i | 27 | m |
| 16 | Springer Spaniel      | m,i | 24 | f |
| 17 | Labrador Retriever    | m,c | 15 | f |
| 18 | Labrador Retriever    | m,i | 16 | m |
| 19 | Labrador Retriever    | f,s | 84 | f |
| 20 | Irish Setter          | f,i | 24 | f |
| 21 | Belgian Malinois      | m,i | 12 | f |
| 22 | Border Collie         | m,i | 24 | m |
| 23 | Labrador Retriever    | f,i | 14 | m |
| 24 | Mix-breed             | m,i | 42 | m |
| 25 | German Shepherd       | f,s | 96 | f |
| 26 | Golden Retriever      | m,i | 84 | f |
| 27 | German Shepherd       | f,i | 96 | f |
| 28 | Labrador Retriever    | f,i | 15 | m |
| 29 | Flat-Coated Retriever | f,i | 15 | f |
| 30 | Border Collie         | f,i | 24 | f |
| 31 | Mix-breed             | m,c | 30 | f |
| 32 | Mix-breed             | m,i | 36 | m |
| 33 | Mix-breed             | m,c | 18 | f |
| 34 | Mix-breed             | f,s | 48 | m |
| 35 | Mix-breed             | f,i | 14 | f |
| 36 | Labrador Retriever    | f,i | 29 | f |
| 37 | Labrador Retriever    | m,i | 48 | f |
| 38 | Pit Bull              | f,i | 21 | f |
| 39 | Dobermann             | m,i | 84 | m |
| 40 | Jack Russell Terrier  | f,i | 29 | f |

**Table S2.** Behaviors analysed and corresponding episodes for which comparisons were made.

| <b>Protocol I</b>         |                        |
|---------------------------|------------------------|
| <b>Behavior</b>           | <b>Episodes</b>        |
| Proximity to/Contact with |                        |
| Stranger vs owner         | 3 vs 4, 6 vs 7         |
| Stranger vs stranger      | 3 vs 6                 |
| Owner vs owner            | 4 vs 7                 |
| Approach                  |                        |
| Stranger vs owner         | 3 vs 4, 6 vs 7         |
| Stranger vs stranger      | 3 vs 6                 |
| Owner vs owner            | 4 vs 7                 |
| Visual orientation to     |                        |
| Owner vs owner            | 4 vs 7                 |
| Stranger vs owner         | 3 vs 4                 |
| Stranger vs stranger      | 3 vs 6                 |
| Door                      | 3 vs 4, 3 vs 5, 6 vs 7 |
| Avoidance of the owner    | 4 vs 7                 |

|                            |                                |
|----------------------------|--------------------------------|
| Exploration                | 3 vs 4, 6 vs 7                 |
| Stress                     | 3 vs 4, 6 vs 7                 |
| Proximity to door          | 3 vs 4, 3 vs 5, 3 vs 6, 6 vs 7 |
| Behaviors towards the door | 3 vs 4, 3 vs 5, 3 vs 6, 6 vs 7 |
| Vocalization               | 3 vs 4, 3 vs 5, 3 vs 6, 6 vs 7 |
| <b>Protocol II</b>         |                                |
| <b>Behavior</b>            | <b>Episodes</b>                |
| Looking at                 |                                |
| Owner vs stranger          | 2 vs 4, 3 vs 5, 7 vs 7         |
| Owner vs owner             | 3 vs 7                         |
| Door                       | 2 vs 6                         |
| Proximity to/Contact with  |                                |
| Owner vs stranger          | 2 vs 4, 3 vs 5, 7 vs 7         |
| Owner vs owner             | 3 vs 7                         |
| Proximity to the door      | 2 vs 6                         |
| Ears back                  | 3 vs 5, 3 vs 7, 5 vs 7         |
| Vocalizations              | 2 vs 6                         |
| Individual play            | 2 vs 4, 2 vs 6                 |
| Exploration of environment | 2 vs 4, 2 vs 6                 |
| Stress                     | 2 vs 4, 2 vs 6                 |
| Greeting interruption      |                                |
| Owner vs stranger          | 3 vs 5                         |
| Owner vs owner             | 3 vs 7                         |
| Stranger vs stranger       | 5 vs 7                         |
| Behaviors against the door | 2 vs 6                         |
| Social play (score)        |                                |
| Owner vs stranger          | 2 vs 3, 2 vs 4, 3 vs 5         |
| Owner vs owner             | 2 vs 5, 3 vs 4                 |
| Greeting (score)           |                                |
| Owner vs stranger          | 3 vs 5, 7 vs 7                 |
| Owner vs owner             | 3 vs 7                         |
| Stranger vs stranger       | 5 vs 7                         |

**Table S3.** Hypotheses of expected results for behavioral comparison between and within secure and avoidant dogs.

| <b>Hypotheses of behavioral differences between secure and avoidant dogs in protocol I</b> |                                                                   |
|--------------------------------------------------------------------------------------------|-------------------------------------------------------------------|
| <b>Episode</b>                                                                             | <b>Hypothesis</b>                                                 |
| 3.I                                                                                        | Protest at separation: Secure>Avoidant<br>Stress: Secure>Avoidant |
| 4.I                                                                                        | Proximity seeking: Secure>Avoidant                                |
| 5.I                                                                                        | Protest at separation: Secure>Avoidant<br>Stress: Secure>Avoidant |
| 6.I                                                                                        | Proximity seeking: Secure>Avoidant                                |
| 7.I                                                                                        | Proximity seeking: Secure>Avoidant                                |
| <b>Hypotheses of behavioral differences between episodes in secure dogs in protocol I</b>  |                                                                   |
| <b>Episode</b>                                                                             | <b>Hypothesis</b>                                                 |
| 3.I vs 4.I                                                                                 | Protest at separation: 3.I>4.I<br>Proximity seeking: 3.I<4.I      |

|                                                                                                       |                                                                                 |
|-------------------------------------------------------------------------------------------------------|---------------------------------------------------------------------------------|
| (1 <sup>st</sup> separation from owner vs 1 <sup>st</sup> separation from stranger)                   | Stress: 3.I>4.I                                                                 |
| 3.I vs 5.I                                                                                            |                                                                                 |
| (1 <sup>st</sup> separation from owner vs 2 <sup>nd</sup> separation from owner and stranger –alone)  | Protest at separation: 3.I<5.I<br>Stress:3.I<5.I                                |
| 3.I vs 6.I                                                                                            |                                                                                 |
| (1 <sup>st</sup> separation owner vs 2 <sup>nd</sup> separation owner)                                | Protest at separation: 3.I<6.I<br>Proximity seeking: 3.I<6.I                    |
| 4.I vs 7.I                                                                                            |                                                                                 |
| (1 <sup>st</sup> reunion with owner vs 2 <sup>nd</sup> reunion with owner)                            | Proximity seeking: 4.I<7.I                                                      |
| 6.I vs 7.I                                                                                            |                                                                                 |
| (2 <sup>nd</sup> separation from owner vs 2 <sup>nd</sup> separation from stranger)                   | Protest at separation: 6.I>7.I<br>Proximity seeking: 6.I<7.I<br>Stress: 6.I>7.I |
| <b>Hypotheses of behavioral differences between episodes in avoidant dogs in protocol I</b>           |                                                                                 |
| <b>Episode</b>                                                                                        | <b>Hypothesis</b>                                                               |
| 3.I vs 4.I                                                                                            |                                                                                 |
| (1 <sup>st</sup> separation from owner vs 1 <sup>st</sup> separation from stranger)                   | Any behavioral categories: 3.I≈4.I                                              |
| <b>Hypotheses of behavioral differences between secure and avoidant dogs in protocol II</b>           |                                                                                 |
| <b>Episode</b>                                                                                        | <b>Hypothesis</b>                                                               |
| 2.II                                                                                                  | Proximity seeking: Sec>Av                                                       |
| 3.II                                                                                                  | Proximity seeking: Sec>Av                                                       |
| 4.II                                                                                                  | Proximity seeking: Sec>Av                                                       |
| 6.II                                                                                                  | Protest at separation: Sec>Av                                                   |
| 7.II                                                                                                  | Proximity seeking: Sec>Av                                                       |
| <b>Hypotheses of behavioral differences between episodes in secure dogs in protocol II</b>            |                                                                                 |
| <b>Episode</b>                                                                                        | <b>Hypothesis</b>                                                               |
| 2.II vs 3.II (1 <sup>st</sup> separation from owner vs 1 <sup>st</sup> reunion with owner)            | Secure base:<br>2.II<3.II                                                       |
| 2.II vs 4.II (1 <sup>st</sup> separation from owner vs 1 <sup>st</sup> separation from stranger)      | Proximity seeking: 2.II<4.II<br>Secure base: 2.II<4.II                          |
| 2.II vs 5.II (owner absence vs owner presence)                                                        | Secure base: 2.II<5.II                                                          |
| 2.II vs 6.II                                                                                          |                                                                                 |
| (1 <sup>st</sup> separation from owner vs 2 <sup>nd</sup> separation from owner and stranger - alone) | Protest at separation: 2.II<6.II                                                |
| 3.II vs 5.II                                                                                          |                                                                                 |
| (1 <sup>st</sup> reunion with owner vs 1 <sup>st</sup> reunion with stranger)                         | Secure base: 3.II>5.II<br>Proximity seeking:<br>3.II>5.II                       |
| 3.II vs 7.II (1 <sup>st</sup> reunion with owner vs 2 <sup>nd</sup> reunion with owner and stranger)  | Proximity seeking:<br>3.II<7.II                                                 |
| 7.II vs 7.II                                                                                          |                                                                                 |
| (2 <sup>nd</sup> reunion with owner vs 2 <sup>nd</sup> reunion with stranger)                         | Proximity seeking:<br>Owner>stranger                                            |
| <b>Hypotheses of behavioral differences between episodes in avoidant dogs in protocol II</b>          |                                                                                 |
| <b>Episode</b>                                                                                        | <b>Hypothesis</b>                                                               |
| 2.II vs 4.II                                                                                          |                                                                                 |
| (1 <sup>st</sup> separation from owner vs 1 <sup>st</sup> separation from stranger)                   | Stress: 2≈4                                                                     |
